# Supplementary material for: Macroalgal Defense against Competitors and Herbivores
Source: MDPI journal article supplement (doi:10.3390/ijms22157865), 2021-07-23
Supplement: s1 [file s1]

# Supplementary material

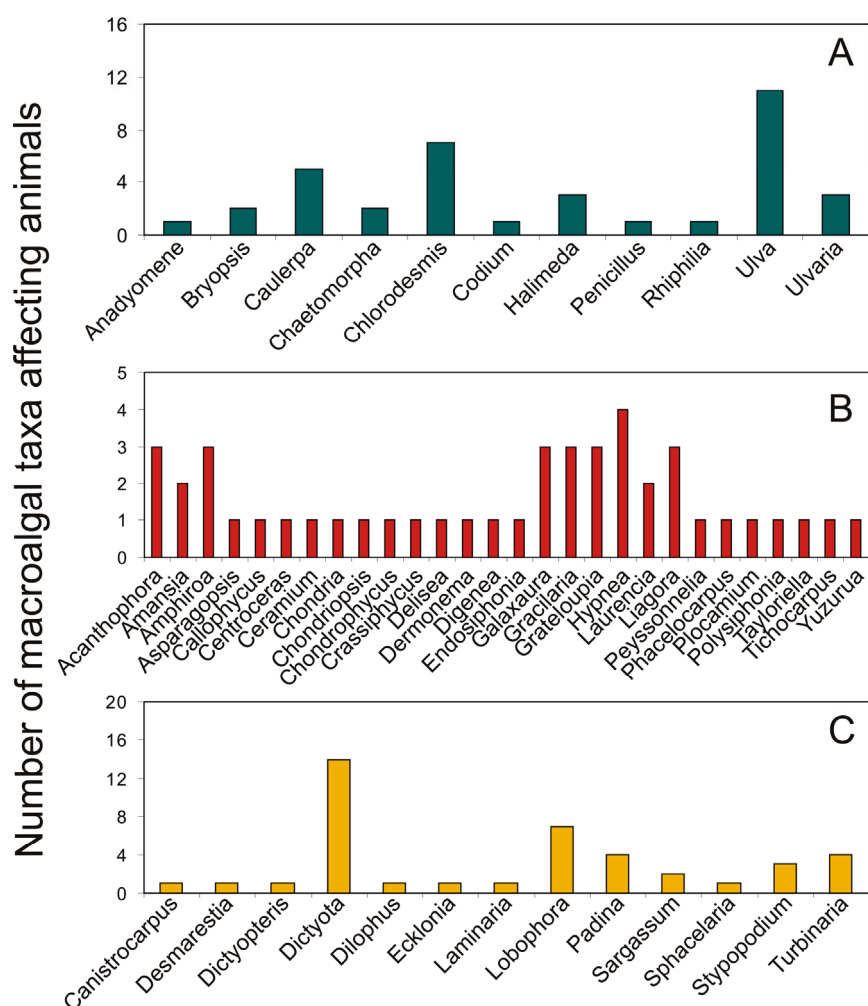

**Figure S1.** Number of allelopathic green algae (A), red algae (B), and brown algae (C) affecting aquatic animals based on taxa found in the literature.

**Table S1.** Studies on donor macroalgae against aquatic organisms published in 32 scientific papers.

| Article                     | Place of origin                                            | Macroalgae species                  | Phylum      |
|-----------------------------|------------------------------------------------------------|-------------------------------------|-------------|
| 1. Andras et al. (2012)     | Votua Reef, Viti Levu, Fiji                                | <i>Callophycus densus</i>           | Rhodophyta  |
|                             |                                                            | <i>Phacelocarpus neurymenioides</i> |             |
|                             |                                                            | <i>Plocamium pacificum</i>          |             |
|                             |                                                            | <i>Rhiphilia pencilloides</i>       |             |
| 2. Co Sin et al. (2012)     | St John's Island, Singapore                                | <i>Bryopsis corymbose</i>           | Chlorophyta |
|                             |                                                            | <i>Halimeda opuntia</i>             |             |
|                             |                                                            | <i>Lobophora variegata</i>          |             |
| 3. Birrell et al., (2008)   | Lizard Island on the Australian Great Barrier Reef         | <i>Padina</i> sp.                   | Phaeophyta  |
|                             |                                                            | <i>Chlorodesmis fastigiata</i>      |             |
| 4. Bonaldo and Hay (2014)   | Coral Coast of Viti Levu, Fiji                             | <i>Galaxaura filamentosa</i>        | Rhodophyta  |
|                             |                                                            | <i>Chlorodesmis fastigiata</i>      |             |
| 5. Del Monaco et al. (2017) | Heron Island, GBR, Australia                               | <i>Chlorodesmis fastigiata</i>      | Chlorophyta |
|                             |                                                            | <i>Amansia glomerata</i>            |             |
|                             |                                                            | <i>Canistrocarpus</i> sp.           |             |
| 6. Fong et al. (2019)       | Pulau Hantu, Pulau Subar Darat, and Kusu Island, Singapore | <i>Bryopsis</i> sp.                 | Chlorophyta |
|                             |                                                            | <i>Endosiphonia horrida</i>         |             |
|                             |                                                            | <i>Hypnea pannosa</i>               |             |

|     |                                 |                                                          |                                |             |
|-----|---------------------------------|----------------------------------------------------------|--------------------------------|-------------|
|     |                                 |                                                          | <i>Lobophora</i> sp.           | Phaeophyta  |
|     |                                 |                                                          | <i>Dictyota</i> sp.            | Phaeophyta  |
| 7.  | Kuffner et al. (2006)           | Long Key, Florida, USA                                   | <i>Lobophora variegata</i>     | Rhodophyta  |
|     |                                 |                                                          | <i>Chondrophycus poiteaui</i>  | Chlorophyta |
|     |                                 |                                                          | <i>Chlorodesmis fastigiata</i> |             |
| 8.  | Longo and Hay (2017)            | Moorea, French Polynesia                                 | <i>Amansia rhodantha</i>       | Rhodophyta  |
|     |                                 |                                                          | <i>Asparagopsis taxiformis</i> |             |
|     |                                 |                                                          | <i>Dictyota bartayresiana</i>  | Phaeophyta  |
|     |                                 |                                                          | <i>Turbinaria ornata</i>       |             |
| 9.  | Huggett et al. (2005)           | New South Wales, Sydney, Australia                       | <i>Ulva australis</i>          | Chlorophyta |
|     |                                 |                                                          | <i>Ulva compressa</i>          |             |
|     |                                 |                                                          | <i>Ulvaria obscura</i>         |             |
| 10. | Morrow et al., (2012)           | Belize, Florida Keys, USA                                | <i>Halimeda tuna</i>           | Chlorophyta |
|     |                                 | Belize                                                   | <i>Dictyota</i> sp.            | Phaeophyta  |
|     |                                 | Saint Thomas, U.S. Virgin Islands                        | <i>Lobophora variegata</i>     | Phaeophyta  |
| 11. | Nelson et al. (2003)            | Parks Bay, Shaw Island, San Juan County, Washington, USA | <i>Ulva fenestrata</i>         | Chlorophyta |
|     |                                 |                                                          | <i>Ulva lens</i>               |             |
| 12. | Olsen et al. (2014)             | Florida Keys, USA                                        | <i>Dictyota menstrualis</i>    | Phaeophyta  |
| 13. | Paul et al. (2011)              | Long Key, Florida, USA                                   | <i>Dictyota pinnatifida</i>    | Phaeophyta  |
|     |                                 |                                                          | <i>Dictyota pulchella</i>      |             |
|     |                                 |                                                          | <i>Chlorodesmis fastigiata</i> | Chlorophyta |
|     |                                 |                                                          | <i>Amphiroa crassa</i>         |             |
| 14. | Rasher et al. (2011)            | Votua Reef, Viti Levu, Fiji                              | <i>Galaxaura filamentosa</i>   | Rhodophyta  |
|     |                                 |                                                          | <i>Liagora</i> sp.             |             |
|     |                                 |                                                          | <i>Dictyota bartayresiana</i>  |             |
|     |                                 |                                                          | <i>Padina boryana</i>          | Phaeophyta  |
|     |                                 |                                                          | <i>Turbinaria conoides</i>     |             |
|     |                                 |                                                          | <i>Chlorodesmis fastigiata</i> | Chlorophyta |
|     |                                 |                                                          | <i>Amphiroa crassa</i>         |             |
|     |                                 |                                                          | <i>Galaxaura filamentosa</i>   | Rhodophyta  |
| 15. | Ritson-Williams et al. (2016)   | Florida Keys, USA                                        | <i>Liagora</i> sp.             |             |
|     |                                 |                                                          | <i>Dictyota bartayresiana</i>  |             |
|     |                                 |                                                          | <i>Padina boryana</i>          | Phaeophyta  |
|     |                                 |                                                          | <i>Sargassum polycystum</i>    |             |
|     |                                 |                                                          | <i>Turbinaria conoides</i>     |             |
| 16. | Ritson-Williams et al. (2020)   | Carrie Bow Cay, Belize                                   | <i>Dictyota bartayresiana</i>  | Phaeophyta  |
|     |                                 |                                                          | <i>Dictyota pulchella</i>      |             |
|     |                                 |                                                          | <i>Lobophora</i> sp.           |             |
|     |                                 |                                                          | <i>Chlorodesmis fastigiata</i> | Chlorophyta |
| 17. | Tanner (1995)                   | Heron Island, Great Barrier Reef, Australia              | <i>Halimeda</i> spp.           | Rhodophyta  |
|     |                                 |                                                          | <i>Peyssonnelia</i> spp.       | Phaeophyta  |
|     |                                 |                                                          | <i>Turbinaria ornata</i>       | Phaeophyta  |
| 18. | Vieira et al. (2016)            | New Caledonia                                            | <i>Lobophora</i> sp.           |             |
| 19. | Webster et al. (2015)           | Ningaloo Reef, Australia                                 | <i>Sphacelaria</i> sp.         | Phaeophyta  |
| 20. | Green-Gavrielidis et al. (2018) | Narragansett Bay, Rhode Island, USA                      | <i>Ulva compressa</i>          | Chlorophyta |
|     |                                 |                                                          | <i>Ulva lactuca</i>            |             |
|     |                                 |                                                          | <i>Ulva obscura</i>            |             |
| 21. | Nelson and Gregg (2013)         | Seattle, Washington, USA                                 | <i>Ulva lactuca</i>            | Chlorophyta |
|     |                                 |                                                          | <i>Ulvaria obscura</i>         |             |
| 22. | Muñoz et al. (2012)             | La Herradura Bay in Coquimbo, Chile                      | <i>Ulva</i> sp.                | Chlorophyta |
| 23. | Van Alstyne et al. (2014)       | Shannon Point Marine Center, Anacortes, Washington, USA  | <i>Ulvaria obscura</i>         | Chlorophyta |
| 24. | Warkus et al. (2010)            | Gulf of Maine                                            | <i>Chaetomorpha</i> spp.       |             |
|     |                                 |                                                          | <i>Codium fragile</i>          | Chlorophyta |
|     |                                 |                                                          | <i>Enteromorpha</i> spp.       |             |
|     |                                 |                                                          | <i>Ulva lactuca</i>            |             |

|     |                                 |                                 |                                                            |             |
|-----|---------------------------------|---------------------------------|------------------------------------------------------------|-------------|
| 25. | Alvarez-Hernández et al. (2019) |                                 | <i>Grateloupia turu turu</i>                               | Rhodophyta  |
|     |                                 |                                 | <i>Polysiphonia denudata</i>                               |             |
|     |                                 |                                 | <i>Desmarestia viridis</i>                                 | Phaeophyta  |
|     |                                 |                                 | <i>Laminaria</i> spp.                                      |             |
|     |                                 | Dzilam de Bravo, Mexico         | <i>Anadyomene stellata</i>                                 |             |
|     |                                 | Mexican Caribbean, the Puerto   |                                                            |             |
|     |                                 | Morelos reef, Mexico            | <i>Caulerpa cupressoides</i>                               |             |
|     |                                 | Mexican Caribbean, the Puerto   |                                                            |             |
|     |                                 | Morelos reef, Mexico            | <i>Caulerpa cupressoides</i>                               |             |
|     |                                 | Mexican Caribbean, the Puerto   |                                                            |             |
|     |                                 | Morelos reef, Mexico            | <i>Caulerpa cupressoides</i>                               | Chlorophyta |
|     |                                 | Chelem, Mexico                  | <i>Caulerpa paspaloides</i>                                |             |
|     |                                 | Faro de Bucerías, Mexico        | <i>Caulerpa racemosa</i>                                   |             |
|     |                                 | Faro de Bucerías, Mexico        | <i>Chaetomorpha antennina</i>                              |             |
|     |                                 | Mexican Caribbean, the Puerto   |                                                            |             |
|     |                                 | Morelos reef, Mexico            | <i>Penicillus capitatus</i>                                |             |
|     |                                 | Costa de Oro, Mexico            | <i>Acanthophora spicifera</i>                              |             |
|     |                                 | Mexican Caribbean, the Puerto   |                                                            |             |
|     |                                 | Morelos reef, Mexico            | <i>Acanthophora spicifera</i>                              |             |
|     |                                 | Dzilam de Bravo, Mexico         | <i>Acanthophora spicifera</i>                              |             |
|     |                                 | Faro de Bucerías, Mexico        | <i>Amphiroa beauvoisii</i>                                 |             |
|     |                                 | La Barrita, Mexico              | <i>Centroceras clavulatum</i>                              |             |
|     |                                 | Mexican Caribbean, the Puerto   |                                                            |             |
|     |                                 | Morelos reef, Mexico            | <i>Ceramium nitens</i>                                     |             |
|     |                                 | Costa de Oro, Mexico            | <i>Chondria littoralis</i>                                 |             |
|     |                                 | Mexican Caribbean, the Puerto   |                                                            |             |
|     |                                 | Morelos reef, Mexico            | <i>Chondriopsis dasyphylla</i> f. <i>pyrifer</i>           |             |
|     |                                 | Costa de Oro, Mexico            | <i>Crassiphycus caudatus</i> ( <i>Gracilaria caudata</i> ) | Rhodophyta  |
|     |                                 | Puerto Vicente Guerrero, Mexico | <i>Dermonema virens</i>                                    |             |
|     |                                 | Mexican Caribbean, the Puerto   |                                                            |             |
|     |                                 | Morelos reef, Mexico            | <i>Digenea simplex</i>                                     |             |
|     |                                 | Boca del Río, Mexico            | <i>Gracilaria cervicornis</i>                              |             |
|     |                                 | Costa de Oro, Mexico            | <i>Gracilaria cervicornis</i>                              |             |
|     |                                 | Costa de Oro, Mexico            | <i>Gracilaria tikvahiae</i>                                |             |
|     |                                 | Boca del Río, Mexico            | <i>Grateloupia filicina</i>                                |             |
|     |                                 | Alvarado harbour, Mexico        | <i>Grateloupia filicina</i>                                |             |
|     |                                 | Boca del Río, Mexico            | <i>Hypnea musciformis</i>                                  |             |
|     |                                 | Costa de Oro, Mexico            | <i>Hypnea musciformis</i>                                  |             |

|     |                          |                                                    |                                               |            |
|-----|--------------------------|----------------------------------------------------|-----------------------------------------------|------------|
|     |                          | La Barrita, Mexico                                 | <i>Hypnea spinella</i>                        |            |
|     |                          | Mexican Caribbean, the Puerto Morelos reef, Mexico | <i>Laurencia obtusa</i>                       |            |
|     |                          | Champotón, Mexico                                  | <i>Laurencia obtusa</i>                       |            |
|     |                          | Mexican Caribbean, the Puerto Morelos reef, Mexico | <i>Liagora ceranoides</i>                     |            |
|     |                          | Punta San Telmo, Mexico                            | <i>Tayloriella dictyurus</i>                  |            |
|     |                          | Champotón, Mexico                                  | <i>Yuzurua poiteaui</i> var. <i>gemmifera</i> |            |
|     |                          | Mexican Caribbean, the Puerto Morelos reef, Mexico | <i>Dictyopteris delicatula</i>                |            |
|     |                          | Celestún, Mexico                                   | <i>Dictyota implexa</i>                       |            |
|     |                          | Punta San Telmo, Mexico                            | <i>Dictyota bartayresiana</i>                 |            |
|     |                          | Mexican Caribbean, the Puerto Morelos reef, Mexico | <i>Lobophora variegata</i>                    | Phaeophyta |
|     |                          | Faro de Bucerías, Mexico                           | <i>Padina gymnospora</i>                      |            |
|     |                          | Faro de Bucerías, Mexico                           | <i>Sargassum liebmannii</i>                   |            |
|     |                          | Mexican Caribbean, the Puerto Morelos reef, Mexico | <i>Stypopodium zonale</i>                     |            |
| 26. | Gerwick et al. (1979)    | Carrie Bow Cay, Belize                             | <i>Stypopodium zonale</i>                     | Phaeophyta |
| 27. | Gerwick et al. (1981)    | Carrie Bow Cay, Belize                             | <i>Stypopodium zonale</i>                     | Phaeophyta |
| 28. | Williamson et al. (2000) | Bare Island, Sydney, Australia                     | <i>Delisea pulchra</i>                        | Rhodophyta |
|     |                          |                                                    | <i>Ecklonia radiata</i>                       | Phaeophyta |
| 29. | Ishii et al. (2004)      | Kushiro, Hokkaido, Japan                           | <i>Tichocarpus crinitus</i>                   | Rhodophyta |
| 30. | Barbosa et al. (2004)    | Atol das Rocas, Rio Grande do Norte, Brazil        | <i>Dictyota pfaffi</i>                        | Phaeophyta |
| 31. | Suzuki et al. (2002)     | Awashima Island, Niigata, Japan                    | <i>Dilophus okamurae</i>                      | Phaeophyta |
| 32. | Tanaka and Higa (1984)   | Kin-cho, Okinawa, Japan                            | <i>Dictyota spinulosa</i>                     | Phaeophyta |

---
